# Supplementary material for: Conformational flexibility of fork-remodeling helicase Rad5 shown by full-ensemble hybrid methods
Source: PubMed Central journal article supplement (PMC6799953; doi:10.1371/journal.pone.0223875), 2019-10-18
Supplement: pone.0223875.s004.pdf [file pone.0223875.s004.pdf]

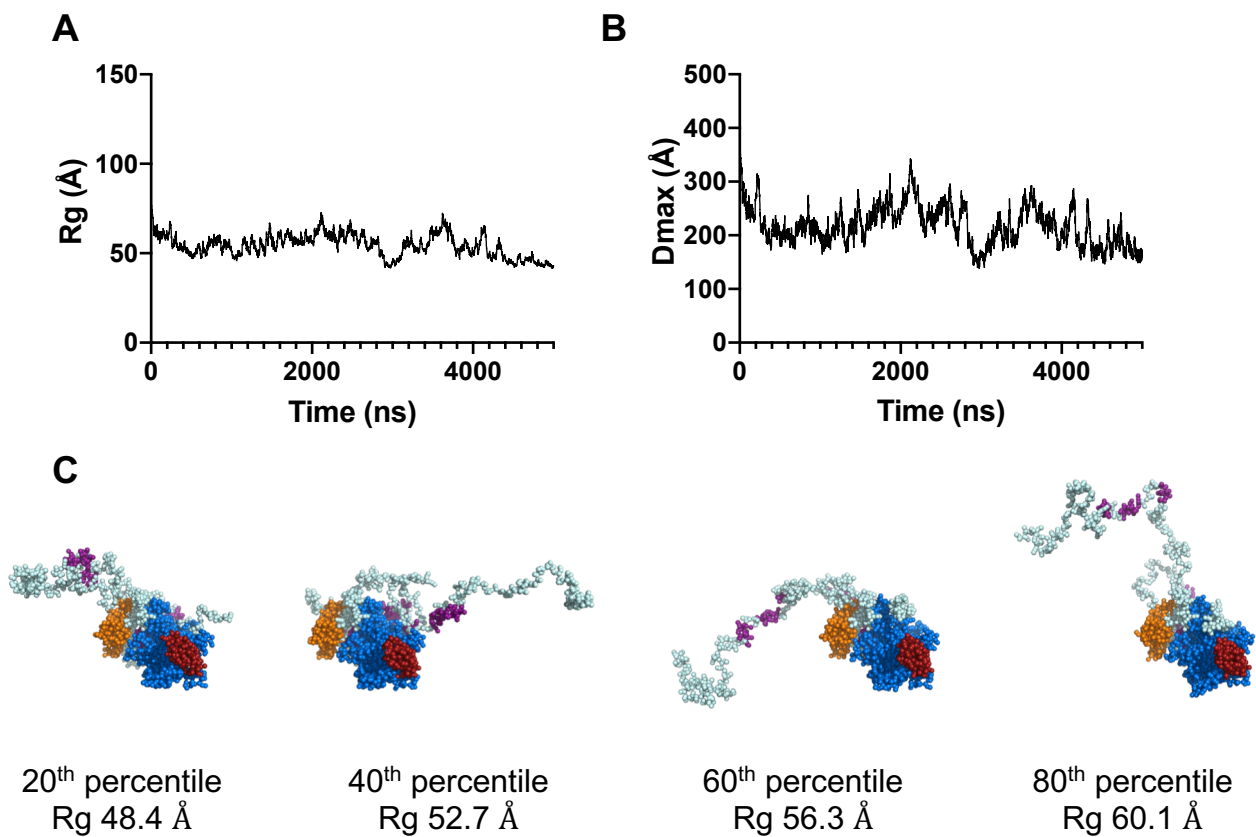

**S3. Supplemental Figure 2:** ZDOCK-based simulation of Rad5. **(A)**  $R_g$  is plotted as a function of time for a 5  $\mu$ s simulation. **(B)**  $D_{max}$  is plotted as a function of time for a 5  $\mu$ s simulation. **(C)** Individual structures from the resulting ensemble arranged in order of increasing  $R_g$  values.
