# Supplementary material for: Conformational flexibility of fork-remodeling helicase Rad5 shown by full-ensemble hybrid methods
Source: PubMed Central journal article supplement (PMC6799953; doi:10.1371/journal.pone.0223875), 2019-10-18
Supplement: pone.0223875.s005.pdf [file pone.0223875.s005.pdf]

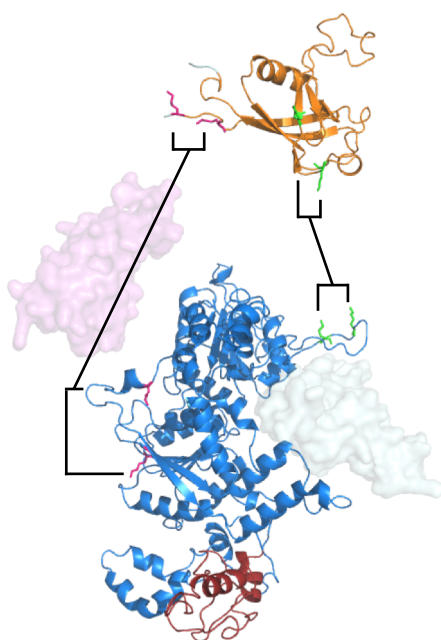

**S5. Supplemental Figure 3:** Crosslinks between the helicase domain and the HIRAN domain of Rad5. The crosslinks in proximity to the ZDOCK position, which is shown in *light pink*, are indicated in *dark pink*. Crosslinks in proximity to the ClusPro position, which is shown in *light green*, are indicated in *dark green*.
