# Supplementary material for: Conformational flexibility of fork-remodeling helicase Rad5 shown by full-ensemble hybrid methods
Source: PubMed Central journal article supplement (PMC6799953; doi:10.1371/journal.pone.0223875), 2019-10-18
Supplement: pone.0223875.s006.pdf [file pone.0223875.s006.pdf]

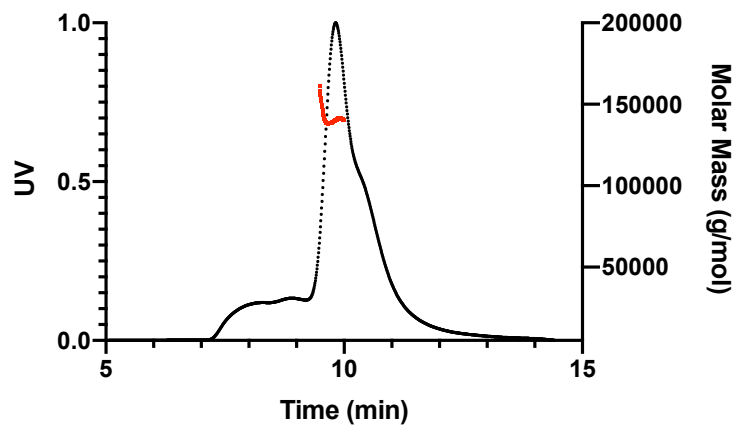

**S6. Supplemental Figure 4:** Multi-angle light scattering (MALS) analysis of Rad5. The  $A_{280}$  is shown in *black*. The molar mass for peak 1 shown in *red*. The calculated molecular weight is 140 kDa, which is in close agreement with the expected molecular weight of the Rad5 monomer, which is 134 kDa.
